# Supplementary material
Source: PubMed Central journal article supplement (PMC7523383)
Supplement: NIHMS1627590-supplement-1.pdf [file NIHMS1627590-supplement-1.pdf]

## SUPPLEMENTAL TABLE

## International Classification of Diseases, 9th edition, codes for exposure and outcome groups

| Code explanation                               | Code                                                      |
|------------------------------------------------|-----------------------------------------------------------|
| Diagnosis                                      |                                                           |
| Cervical cancer                                | 1800, 1801, 1808, 1809                                    |
| Obesity                                        | 27800                                                     |
| Morbid obesity                                 | 27801                                                     |
| History of radiation                           | V153, V661, E9268, E9269, V671                            |
| History of chemotherapy                        | V5811, V662, V672, V8741                                  |
| Procedure                                      |                                                           |
| Cesarean delivery                              | 740, 741, 742, 743, 744, 749                              |
| Radical hysterectomy                           | 686, 6861, 6869, 687, 6871, 6879                          |
| Laparoscopic abdominal                         | 6861                                                      |
| Abdominal                                      | 6869, 686                                                 |
| Laparoscopic vaginal                           | 6871                                                      |
| Vaginal                                        | 6879, 687                                                 |
| Lymphadenectomy                                | 400, 401, 4024, 4029, 403, 4052, 4053, 4054, 4059, 409    |
| Postoperative complication                     |                                                           |
| Trendelenberg position-dependent complications |                                                           |
| Fluid overload                                 | 27669                                                     |
| Laryngeal edema                                | 47825, 4786                                               |
| Air embolism                                   | 9991, 9580                                                |
| Cerebral edema                                 | 3485                                                      |
| Pulmonary edema                                | 5184                                                      |
| Respiratory failure                            | 5185, 5188, 99739                                         |
| Requirement for prolonged ventilation          | 9671, 9672                                                |
| Aspiration                                     | 77085, 77086, 99732                                       |
| Atelectasis                                    | 7704, 7705                                                |
| Peripheral nerve injury                        | 953, 954, 955, 956, 957, 9970                             |
| Retinal injury (tear or detachment)            | 36100, 36101, 36102, 36103, 36104, 36105, 3612, 3613      |
| Retinal edema                                  | 36283                                                     |
| Corneal edema                                  | 3712                                                      |
| Corneal abrasion                               | 3700, 3713, 37140, 37142, 37170, 9181                     |
| Chemosis or conjunctival injury                | 9180, 9182, 9189, 37250, 37271, 37272, 37273, 37289, 3729 |
| Cardiac arrhythmia, arrest, or failure         | 427, 428, 429                                             |
| Compartment syndrome                           | 9589, 7297                                                |
| Rhabdomyolysis                                 | 72888                                                     |
| Bladder injury                                 | 8670, 8671                                                |
| Ureteral injury                                | 8672, 8673                                                |
| Intestinal injury                              | 8632, 8633, 8634, 8635, 8628                              |
| Vascular injury                                | 9020, 9021, 9022, 9023, 9024, 9025, 9028, 9029, 9049      |
| Hemorrhage                                     | 99811, 9582, 2851                                         |

Matsuo. Cesarean radical hysterectomy for cervical cancer in the United States. *Am J Obstet Gynecol* 2020.

(continued)

**SUPPLEMENTAL TABLE****International Classification of Diseases, 9th edition, codes for exposure and outcome groups** (continued)

| <b>Code explanation</b>                        | <b>Code</b>                                                                                                                                                                                                                                                                                                |
|------------------------------------------------|------------------------------------------------------------------------------------------------------------------------------------------------------------------------------------------------------------------------------------------------------------------------------------------------------------|
| Postoperative shock                            | 9980, 9954                                                                                                                                                                                                                                                                                                 |
| Wound complications                            | 9583, 99812, 99813, 9983, 9985, 99883                                                                                                                                                                                                                                                                      |
| Venous thromboembolism/pulmonary Embolism      | 452, 453, 4151, 4162                                                                                                                                                                                                                                                                                       |
| Cerebrovascular accident                       | 4329, 433, 434, 435, 436, 437                                                                                                                                                                                                                                                                              |
| Myocardial infarction                          | 410                                                                                                                                                                                                                                                                                                        |
| Pneumonia                                      | 480, 481, 482, 483, 484, 485, 486, 99731, 99732                                                                                                                                                                                                                                                            |
| Systemic inflammatory response Syndrome/Sepsis | 9959                                                                                                                                                                                                                                                                                                       |
| Ileus/small bowel obstruction                  | 5601, 5603, 5608, 5609                                                                                                                                                                                                                                                                                     |
| Intestinal perforation                         | 56983                                                                                                                                                                                                                                                                                                      |
| Acute kidney injury                            | 584                                                                                                                                                                                                                                                                                                        |
| Pyelonephritis                                 | 590                                                                                                                                                                                                                                                                                                        |
| Coagulopathy                                   | 79092, 2867, 28659, 2866, 2867, 2869                                                                                                                                                                                                                                                                       |
| Electrolyte imbalance                          | 276                                                                                                                                                                                                                                                                                                        |
| Intraabdominal abscess                         | 56722, 56731, 56738, 5695                                                                                                                                                                                                                                                                                  |
| <b>Charlson Comorbidity Index</b>              |                                                                                                                                                                                                                                                                                                            |
| CC1: Myocardial infarction                     | 410, 411, 412                                                                                                                                                                                                                                                                                              |
| CC2: Congestive heart failure                  | 39891, 40201, 40211, 40291, 40401, 40403, 40411, 40413, 40491, 40493, 4254, 4255, 4357, 4258, 4259, 428                                                                                                                                                                                                    |
| CC3: Peripheral vascular disease               | 0930, 4373, 440, 441, 442, 443, 444, 445, 446, 447, 448, 449, 451, 452, 453, 454, 455, 456                                                                                                                                                                                                                 |
| CC4: Cerebrovascular disease                   | 3623, 430, 431, 432, 433, 434, 435, 436, 437, 438                                                                                                                                                                                                                                                          |
| CC5: Dementia                                  | 290, 294, 331                                                                                                                                                                                                                                                                                              |
| CC6: Chronic pulmonary disease                 | 415, 416, 490, 491, 492, 493, 494, 495, 496, 500, 501, 502, 503, 504, 505, 506, 507, 508, 510, 511, 512, 513, 514, 515, 516, 517, 518, 519                                                                                                                                                                 |
| CC7: Connective tissue disease                 | 710, 711, 712, 713, 714, 715, 716                                                                                                                                                                                                                                                                          |
| CC8: Peptic ulcer disease                      | 531, 532, 533, 534, 535                                                                                                                                                                                                                                                                                    |
| CC9: Mild liver disease                        | 0701, 0703, 0705, 07070, 0709, 5710, 5713, 5714, 5716, 5718, 5719, 5731, 5732, 5733, 5738, 5739                                                                                                                                                                                                            |
| CC10: Diabetes mellitus without complications  | 2490, 2500                                                                                                                                                                                                                                                                                                 |
| CC11: Diabetes mellitus with complications     | 2491, 2492, 2493, 2494, 2495, 2496, 2497, 2498, 2499, 2501, 2502, 2503, 2504, 2505, 2506, 2507, 2508, 2509                                                                                                                                                                                                 |
| CC12: Paraplegia and hemiplegia                | 3341, 342, 343, 344                                                                                                                                                                                                                                                                                        |
| CC13: Renal disease                            | 403, 404, 580, 581, 582, 583, 584, 585, 586, 587, 588, 589, 590, 591, 592, 593                                                                                                                                                                                                                             |
| CC14: Cancer                                   | 140, 141, 142, 143, 144, 145, 146, 147, 148, 149, 150, 151, 152, 153, 154, 155, 156, 157, 158, 159, 160, 161, 162, 163, 164, 165, 170, 171, 172, 173, 174, 175, 176, 179, 180, 181, 182, 183, 184, 185, 186, 187, 188, 189, 190, 191, 192, 193, 194, 195, 200, 201, 202, 203, 204, 205, 206, 207, 208, 209 |
| CC15: Moderate or severe liver disease         | 4560, 4561, 4562, 570, 5711, 5712, 5715, 572, 5730, 5734, 5735, V427, 99682                                                                                                                                                                                                                                |
| CC16: Metastatic carcinoma                     | 196, 197, 198, 199                                                                                                                                                                                                                                                                                         |
| CC17: HIV/AIDS                                 | 042, 07953, 79571, V08                                                                                                                                                                                                                                                                                     |

Matsuo. Cesarean radical hysterectomy for cervical cancer in the United States. *Am J Obstet Gynecol* 2020.
